# Supplementary material
Source: publisher site journal article supplement (https://www.dovepress.com/article/310385)
Supplement: Supplementary file 1 [file get_supplementary_file.php]

**Additional file 1** Main characteristics of included RCTs

**Additional file 2** Assessment of inconsistency results

**Additional file 3** Assessment of convergence of the model results

**Additional file 4** References for included RCTs (Chinese and English)

**Additional file 5** Treatment ranking and SUCRA for outcomedata

**Additional file 1** Main characteristics of included RCTs (Note: References are in Additional file 4).

| **Study** | **Country** | **Acute or Chronic** | **Sample size** | **Allocation ratio** | **Age** | **Gender (M:F)** | **(A)** | **(B)** | **(C)** | **(D)** | **Duration of treatment(Days)** | **Outcomes** | **Main Results** |
| --- | --- | --- | --- | --- | --- | --- | --- | --- | --- | --- | --- | --- | --- |
| **Treatment Group** | **Control Group I** | **Control Group II** | **Control Group III** |
| Zhang A 2020 [1] | China | C | 76 | 1:1 | A:44.3±12.6;B:42.9±11.7 | A:(11:27);B:(10:28) | **electric acupuncture** (BL23, BL40, EX-B2, ashixue, BL32, EX-B6)**+** **moxibustion** (BL23, DU4, DU3, EX-B7, BL25, BL26) | **routine care** (fomentation) | - | - | 28D | 1.VAS;2.ODI | 1:A>B;2:A>B |
| Yuan Q 2016 [2] | China | C | 150 | 1:1:1 | A:47.2±13.8;B:45.5±13.2;C:44.0±13.1 | A:(17:33);B:(15:35);C(16:34) | **manual acupuncture** (BL23, BL25, BL40, DU3, GB30) | **placebo** (Same as group A) | **routine care** (Waiting group) | - | 42D | 1.VAS;2.ODI;3.AE | 1:A>B>C;2:A>B>C;3:A=B |
| Cheng J 2020 [3] | China | C | 60 | 1:1 | A:38.20±10.03;B:36.83±11.36 | A:(16:14);B(17:13) | **manual acupuncture** (BL23, BL25, DU3, BL40, ashixue)+ **moxibustion** (DU) | **manual acupuncture** (BL23, BL25, DU3, BL40, ashixue) | - | - | 42D | 1.VAS;2.ODI;3.AE | 1:A>B;2:A>B;3:A=B |
| Yin X 2019 [4] | China | C | 60 | 1:1 | A:44.46±2.27;B:43.13±1.87 | A:(19:11);B(17:13) | **electric acupuncture** (DU3, GB30, BL32, BL56，ST34, ST40, GB33, GB38) | **conventional medicines** (Diclofenac sodium 75mg-time, 1 time/d, 20d) | - | - | 20D | 1.VAS;2.ODI | 1:A>B;2:A>B |
| Hu X 2020 [5] | China | N | 120 | 1:1:1 | A:53±14;B:54±15;C:55±16 | A:(23:17);B:(23:17);C:(21:19) | **moxibustion** (DU) | **moxibustion** (ashixue) | **routine care** (Waiting group) | - | 16D | 1.VAS;2.ODI | 1:A>B>C;2:A>B>C |
| Xiao J 2012 [6] | China | C | 100 | 1:1 | A:52.3±8.1;B:51.7±7.6 | A:(23:27);B:(21:29) | **manual acupuncture** (ashixue)+ **conventional medicines** (Paracetamol oxycodone tablets，Take 5mg before treatment) | **manual acupuncture** (ashixue) | - | - | 8D | 1.VAS;2.ODI;3.AE | 1.A=B;2:A>B;3.A=B |
| Pan L 2018 [7] | China | N | 116(Fall off 2 cases) | 1:1 | A:31.57±5.12;B:31.65±5.34 | A:(22:35);B:(25:32) | **moxibustion** (BL23, BL25, GB34, DU3, ashixue) | **conventional medicines** (Celecoxib 400mg/d，14d) | - | - | 14D | 1.VAS;2.AE | 1.A>B;2.A=B |
| Yuan S 2016 [8] | China | A | 60 | 1:1 | A:44.4±9.82;B:40.77±8.08 | A:(18:12);B:(16:14) | **manual acupuncture** (ashixue, EX-B2, BL23, BL32, BL54, BL40, SP6, KI3) | **routine care** (Stay in bed) | - | - | 7D | 1.VAS;2.ODI;3.AE | 1.A>B;2.A>B;3.A=B |
| Zhou J 2020 [9] | China | C | 120 | 1:1 | A:42.3±6.2;B:42.3±6.2 | A:(29:31);B:(33:27) | **fire acupuncture** (BL67, BL1, GB44, GB2, KI1, RN23)+ **manual acupuncture** (BL23, DU3, ashixue, BL40) | **conventional medicines** (Celecoxib 200mg/time, 2 times/d; Eperisone hydrochloride 50mg/time, 3times/d, 21d) | - | - | 21D | 1.VAS;2.AE | 1.A>B;2.A>B |
| Yang Y 2019 [10] | China | C | 110 | 1:1 | A:49±8.63;B:47±6.37 | A:(26:29);B:(21:34) | **fire acupuncture** (BL23, DU3, BL25, BL40, ashixue) | **manual acupuncture** (BL23, DU3, BL25, BL40, ashixue) | - | - | 28D | 1.VAS | 1.A>B |
| Chen P 2015 [11] | China | C | 120 | 1:1 | A:56.60±15.11;B:57.45±14.79 | A:(32:28);B:(34:26) | **fire acupuncture** (BL23, BL25, ashixue)+ **manual acupuncture** (BL23, BL25, GB39, BL62, BL60, GB30) | **manual acupuncture** (BL23, BL25, GB39, BL62, BL60, GB30) | - | - | 28D | 1.VAS;2.AE | 1.A>B;2.A<B |
| Wang X 2018 [12] | China | C | 96 | 1:1 | A:57.6±14.3;B:56.4±14.8 | A:(25:23);B:(26:22) | **fire acupuncture** (ashixue)+ **manual acupuncture** (BL23, BL25) | **manual acupuncture** (BL23, BL25, GB39, BL60, GB30) | - | - | 28D | 1.VAS | 1.A>B |
| Zhang W 2018 [13] | China | C | 80 | 1:1 | A:37±14;B:39±12 | A:(21:19);B:(18:22) | **fire acupuncture** (EX-B2, ashixue, BL23 , DU4, DU3, BL40 , BL1 , BL67) | **conventional medicines** (Acetaminophen tablets，0.5g/d, 14d) | - | - | 28D | 1.ODI;2.VAS;3.AE | 1.A>B;2.A>B;3.A=B |
| Zhang H 2014 [14] | China | N | 110 | 1:1 | A:38.10±6.03;B:37.94±6.21 | A:(33:22);B:(35:20) | **moxibustion** (BL23, ashixue) | **conventional medicines** (ibuprofen, 0.3g/time, 2times/d, 10d) | - | - | 10D | 1.VAS | 1.A>B |
| Jin X 2018 [15] | China | C | 60 | 1:1 | A:51±14;B:48±13 | A:(12:18);B:(10:20) | **manual acupuncture** (BL20, BL22, BL24, BL26)+Mox(BL20, BL22, BL24, BL26) | **warm acupuncture** (BL20, BL22, BL24, BL26) | - | - | 21D | 1.VAS;2.ODI;3.AE | 1.A>B;2.A>B;3.A>B |
| H Vakilsamad 2018 [16] | China + Iran | N | 90(Fall off 7 cases) | 1:1:1 | A:55.46±9.83;B:60.10±11.45;C:58.88±10.61 | A:(14:14);B:(16:13);C(14:12) | **auricular needle** (Shenmen, Subcortex, Prostaglandin, Lumbago, The corresponding lower back (lumbar vertebrae) point on the back of ear by Magnetic Pellet) | **auricular needle** (Shenmen, Subcortex, Prostaglandin, Lumbago, The corresponding lower back (lumbar vertebrae) point on the back of ear by Vaccaria Seed) | **placebo** (Mouth, Stomach, Duodenum, Eye, Tonsil) | - | 28D | 1.VAS | 1.A=B>C |
| Ye R 2017 [17] | China | C | 130 | 1:1 | A:60.77±8.12;B:60.05±8.26 | A:(16:49);B:(17:48) | **electric acupuncture** (BL23, BL24, BL25, GB30, GB34, BL40, BL57, BL60, ashixue)+ **conventional medicines** (Celecoxib，0.2g/time，2times/d) | **conventional medicines** (Celecoxib，0.2g/time，2 times/d) | - | - | 28D | 1.VAS | 1.A>B |
| Yang Y 2017 [18] | China | N | 104 | 1:1 | A:58.50±12.05;B:56.30±11.65 | A:(24:28);B:(25:27) | **electric acupuncture** (ashixue+EX-B2, BL23, BL25) | **manual acupuncture** (EX-B2, BL23, BL25) | - | - | 20D | 1.VAS;2.AE | 1.A>B;2.A=B |
| Lai P 2019 [19] | China | N | 126 | 1:1:1 | A:49.38 ± 10.32;B:52.26 ± 9.86;C:51.67 ± 11.25 | A:(23:19);B:(22:20);C:(21:21) | **electric acupuncture** (BL23, RN6, BL25, DU3, DU4, ashixue) | **warm acupuncture** (BL23, BL25, ashixue) | **electric acupuncture** (BL23, BL25, ashixue)+ **warm acupuncture** (BL23, BL25, ashixue) | - | 19D | 1.VAS | 1.A=B<C; |
| Li J 2017 [20] | China | C | 60 | 1:1 | A:42.1±6.35;B:41.9±6.27 | A:(18:12);B:(16:14) | **manual acupuncture** (ashixue) | **electric acupuncture** (EX-B2, BL23,BL25, GB30) | - | - | 25D | 1.VAS;2.ODI | 1.A>B;2.A>B |
| Tian J 2019 [21] | China | C | 56 | 1:1 | A:31.73±7.21;B:32.67±5.53 | A:(11:17);B:(15:13) | **manual acupuncture** (DU16, DU20, DU5, DU3) | **conventional medicines** (Loxoprofen Sodium Tablets 60mg/time, 2times/d, 14d) | - | - | 14D | 1.VAS;2.ODI | 1.A>B;2.A>B |
| J Zaringhalam 2010 [22] | Iran | C | 84(Fall off 4 cases) | 1:1:1:1 | A:(54.2±5.4);B:(55.1±3.3);C:(54.2±5.6);D:(54.3±4.2) | A:(20:0);B:(20:0);C:(20:0);D:(20:0) | **manual acupuncture** (BL23, BL25, BL28, BL32, BL60, GB30, GB34) | **conventional medicines** (Baclofen 30mg/d) | **manual acupuncture** (same as group A)+ **conventional medicines** (the same as group B) | **routine care** (Waiting group) | 35D | 1.VAS | 1.C>A>B=D |
| K Thomas 2006 [23] | England | N | 241(Fall off 2 cases) | 2:1 | A:42.0±10.8;B:44.0±10.4 | A:(60:99);B:(34:46) | **manual acupuncture** (individualised treatment) | **routine care** (usual care) | - | - | 90D | 1.ODI | 1.A=B |
| J Comachio 2020 [24] | Brazil | C | 66 | 1:1 | A:49±8.5;B:46±8.9 | A:(10:23);B:(14:19) | **manual acupuncture** (GB41, TE5, ST36, HT3, LI4, KI7, GV4, SP6, BL23, BL30, BL58, BL60) | **electric acupuncture** (GB41, TE5, ST36, HT3, LI4, KI7, GV4, SP6, BL23, BL30, BL58, BL60) | - | - | 42D | 1.NRS | 1.A=B |
| A Ushinohama 2016 [25] | Brazil | C | 80 | 1:1 | A:37.9±7.7;B:34.3±8.9 | A:(13:27);B:(17:23) | **auricular needle** (Shenmen point, Low back point, Analgesic point) | **placebo** (detuned ultrasound) | - | - | 1 time | 1.NRS | 1.A>B |
| P Leite 2018 [26] | Brazil | C | 69 | 1:1:1:1 | A:42.35±3.35;B:41.82±3.34;C:48.72±3.61;D: 52.58±3.65 | A:(7:10);B:(8:10);C:(8:9) | **electric acupuncture** (B22, B26, B50, B53，During the 30-minute stimulation, frequency was alternated between high and low every 5 seconds.) | **manual acupuncture** (B22, B26, B50, B53, During the 30/minute stimulation) | **placebo** (B22, B26, B50, B53, they were withdrawn immediately after puncture) | - | 22D | 1.NRS | Baseline is not neat |
| J Vas 2012 [27] | Spain | A | 275 | 1:1:1:1 | A:41.90±10.30;B:44.00±9.40;C:43.60±12.20;D:41.20±12.0 | A:(25:43);B:(29:39);C(35:34);D:(25:45) | **manual acupuncture** (individualised treatment) | **placebo** (nonspecific acupuncture points) | **placebo** (points on the patient’s back were selected and momentary pressure applied with a semiblunted needle fitted within a guide tube) | **conventional medicines** (paracetamol 500-650 mg/6-8 h, maximum dose 4 g/d, ibuprofen 400-600 mg/8 h, diclofenac 50 mg/8-12 h, cyclobenzaprine 10 mg/6-8 h, maximum 1 week) | 14D | 1.AE | 1.A=B>C=D |
| T Skonnord 2020 [28] | Norwegian | A | 167 | 1:1 | A:39.8±11.4;B:39.3±9.4 | A:(40:41);B:(42:44) | **manual acupuncture** (Yaotongxue, Yaotongdian)+ **conventional medicines** (paracetamol and/or ibuprofen) | **conventional medicines** (paracetamol and/or ibuprofen) | - | - | 1 time | 1.NRS | - |
| T Hasegawa 2014[29] | Brazil | A | 80 | 1:1 | A:47.0±9.8;B:43.9±10.9 | A: (15:25)；B:(14:26) | **manual acupuncture** ( basic points D, H and I and kidney, bladder and liver points of Y amamoto’s method) | **placebo** (non-penetrating acupuncture) | - | - | 28D | 1.VAS;2.AE | 1.A>B;2.A=B |
| Y Cho 2013[30] | Korean | C | 130(Fall off 14 cases) | 1:1 | A:42.39±14.62;B:41.75±13.57 | A:(10:47);B:(8:51) | **manual acupuncture** (individualised treatment) | **placebo** (nonpenetrating sham needles) | - | - | 42D | 1.VAS;2.ODI;3.AE | 1.A＞B;2.Baseline of ODI is not neat;3.A＞B |

**Additional file 2** Assessment of inconsistency results

(1) Node-splitting test result for reduction in VAS score.

| Name | Direct Effect | Indirect Effect | Overall | P-Value |
| --- | --- | --- | --- | --- |
| A, B | -0.11 (-1.26, 1.03) | -0.72 (-2.89, 1.30) | -0.35 (-1.30, 0.52) | 0.58 |
| A, D | -1.93 (-3.42, -0.39) | -0.37 (-1.60, 0.84) | -1.01 (-2.02, -0.05) | 0.12 |
| A, F | -1.83 (-3.15, -0.55) | -2.24 (-5.17, 0.63) | -1.89 (-2.97, -0.81) | 0.78 |
| A, I | 1.84 (-0.22, 3.89) | 0.68 (-1.73, 3.05) | 1.35 (-0.20, 2.88) | 0.44 |
| A, M | 1.08 (-1.07, 3.27) | 2.26 (-1.00, 5.47) | 1.47 (-0.31, 3.23) | 0.51 |
| A, O | 3.14 (1.74, 4.56) | 1.51 (-0.84, 3.89) | 2.71 (1.47, 3.90) | 0.24 |
| B, D | -0.58 (-2.65, 1.44) | -0.72 (-2.23, 0.80) | -0.67 (-1.86, 0.54) | 0.92 |
| B, E | -0.30 (-2.29, 1.63) | -0.85 (-2.28, 0.66) | -0.35 (-1.59, 0.87) | 0.63 |
| B, G | 1.27 (-0.92, 3.49) | 0.05 (-3.05, 3.26) | 0.87 (-0.84, 2.62) | 0.51 |
| C, D | -1.55 (-3.11, -0.01) | -2.02 (-4.63, 0.57) | -1.67 (-2.92, -0.40) | 0.74 |
| C, F | -2.75 (-4.82, -0.60) | -2.31 (-4.42, -0.14) | -2.55 (-3.97, -1.08) | 0.77 |
| D, F | -0.35 (-2.70, 2.05) | -0.98 (-2.46, 0.59) | -0.87 (-2.13, 0.40) | 0.65 |
| D, I | 1.87 (-0.22, 3.99) | 3.01 (0.73, 5.41) | 2.37 (0.85, 3.91) | 0.45 |
| D, N | 2.06 (-0.24, 4.34) | 1.20 (-1.09, 3.54) | 1.54 (0.03, 3.10) | 0.58 |
| D, O | 2.79 (0.65, 4.91) | 4.38 (2.64, 6.16) | 3.72 (2.36, 5.08) | 0.24 |
| E, F | -1.58 (-3.76, 0.61) | -0.78 (-2.49, 0.91) | -1.19 (-2.50, 0.18) | 0.53 |
| F, N | 2.52 (0.09, 4.83) | 2.04 (-0.34, 4.41) | 2.42 (0.86, 4.00) | 0.75 |
| G, M | 1.27 (-0.82, 3.39) | 0.08 (-3.09, 3.37) | 0.94 (-0.76, 2.64) | 0.51 |

(2) Node-splitting test result for reduction in ODI score.

| Name | Direct Effect | Indirect Effect | Overall | P-Value |
| --- | --- | --- | --- | --- |
| A, B | -4.71 (-25.14, 15.73) | 15.79 (-15.28, 47.31) | 1.83 (-16.42, 20.52) | 0.21 |
| A, D | -0.79 (-22.48, 21.31) | -21.38 (-49.96, 7.90) | -8.69 (-27.01, 10.74) | 0.20 |
| B, D | -16.86 (-37.42, 4.67) | 3.98 (-28.26, 34.09) | -10.44 (-28.66, 8.81) | 0.21 |

**Additional file 3** Assessment of convergence of the model results

(1) PSRF value for reduction in VAS score.

| Parameter | PSRF |
| --- | --- |
| d.A.B | 1.00 |
| d.A.D | 1.00 |
| d.A.E | 1.00 |
| d.A.F | 1.00 |
| d.A.I | 1.00 |
| d.A.M | 1.00 |
| d.A.N | 1.00 |
| d.A.O | 1.00 |
| d.B.L | 1.00 |
| d.D.C | 1.00 |
| d.D.J | 1.00 |
| d.E.H | 1.00 |
| d.F.K | 1.00 |
| d.M.G | 1.00 |
| sd.d | 1.00 |

(2) PSRF value for reduction in ODI score.

| Parameter | PSRF |
| --- | --- |
| d.A.B | 1.00 |
| d.A.D | 1.00 |
| d.A.E | 1.00 |
| d.A.F | 1.00 |
| d.A.M | 1.00 |
| d.A.N | 1.00 |
| d.D.I | 1.00 |
| d.F.C | 1.00 |
| d.F.K | 1.00 |
| d.M.G | 1.00 |
| sd.d | 1.00 |

**Additional file 4** References for included RCTs (Chinese and English)

[1] 张阿芳. 针灸处方在慢性非特异性下腰痛中的治疗价值[J]. 黑龙江中医药, 2020, v.49; No.309(01):314-315.

Zhang AF. The therapeutic value of acupuncture prescription in chronic nonspecific low back pain. Heilongjiang journal of Traditional Chinese Medicine. 2020, v.49; No.309(01):314-315.

[2] 袁启令, 刘亮, 马江涛等. 针刺治疗慢性非特异性腰痛的临床研究[J]. 中医正骨, 2016(6):12-17.

Yuan QL, Liu L, Ma JT, et al. A clinical study of acupuncture therapy for treatment of chronic nonspecific low back pain. The Journal of Traditional Chinese Orthopedics and Traumatology. 2016(6):12-17.

[3] 程娇. 针刺结合督灸治疗慢性非特异性腰痛（寒湿型）的临床观察[D].湖北中医药大学,2020.

Cheng J. Clinical Observation on Acupuncture and Du-Moxibustion in Treating Chronic Non-specific Low Back Pain(Cold-dampness type)[Master]. Hubei University of Traditional Chinese Medicine, 2020.

[4] 尹秀珍,徐凤励,谢晟洁.针刺干预慢性非特异性腰痛效果观察[J].社区医学杂志,2019,17(23):1503-1506.

Yin XZ, Xu FL, Xie SJ. Clinical observation of acupuncture intervention on chronic nonspecific low back pain. Journal of community medicine. 2019,17(23):1503-1506.

[5] 胡秀武,唐丽梅,邓陈英等.长蛇灸治疗寒湿型非特异性腰痛临床观察[J].中国针灸,2020,40(07):713-716.

Hu XW, Tang LM, Deng CY, et al. Effect of long-snake moxibustion on nonspecific low back pain with symptom of cold and dampness. Chinese Acupuncture & Moxibustion. 2020,40(07):713-716.

[6] 肖京,金添,陈京锋.银质针联合氨酚羟考酮治疗慢性腰痛的临床观察[J].中国中西医结合杂志,2012,32(10):1430-1431.

Xiao J, Jin T, Chen JF. Clinical observation of silver needle combined with paracetamol oxycodone in the treatment of chronic low back pain. Chinese Journal of Integrated Traditional and Western Medicine. 2012,32(10):1430-1431.

[7] 潘良. 麦粒灸治疗非特异性下腰痛临床观察[D].浙江中医药大学,2018.

Pan L. Clinical observation of moxibustion treatment of nonspecific low back pain[Master]. Zhejiang University of Traditional Chinese Medicine, 2018.

[8] 袁仕国,徐明奎,周理等.急性非特异性腰痛传统针刺与卧床休息干预的康复比较[J].海南医学,2016,27(02):306-307.

Yuan SG, Xu MK, Zhou L, et al. Comparison of rehabilitation between traditional acupuncture and bed rest intervention for acute nonspecific low back pain. Hainan Medical Journal. 2016,27(02):306-307.

[9] 周静,范锲,何舟.火针点刺根结穴结合针刺治疗慢性非特异性下腰痛临床疗效观察[J].广西医科大学学报,2020,37(07):1326-1330.

Zhou J, Fan Q, He Z. Observation on clinical effect of fire-needling as main therapy for chronic nonspecific low back pain. Journal of Guangxi Medical University. 2020,37(07):1326-1330.

[10] 杨怡,赵杰,周小平等.贺氏火针治疗慢性非特异性腰痛临床对照研究[J].长春中医药大学学报,2019,35(01):88-90.

Yang Y, Zhao J, Zhou XP, et al. Clinical Controlled Trial of Chronic Nonspecific Low Back Pain with He's Fire Needle Therapy. Journal of Changchun University of Chinese Medicine. 2019,35(01):88-90.

[11] 陈鹏,郭静,刘慧林等.贺氏火针疗法配合毫针治疗慢性非特异性腰痛120例临床观察[J].中医杂志,2015,56(10):851-854.

Chen P, Guo J, Liu HL, et al. Clinical observation of 120 cases of chronic nonspecific low back pain treated with Heshi fire needle therapy and millineedle therapy. Journal of Traditional Chinese Medicine. 2015,56(10):851-854.

[12] 王新伟.贺氏火针点刺治疗慢性非特异性腰痛[J].吉林中医药,2018,38(09):1098-1100.

Wang XW. Effect of HE's fire needle acupuncture in the treatment of chronic nonspecific lumbar pain. Jilin Journal of Chinese Medicine. 2018,38(09):1098-1100.

[13] 张婉瑜,丁影.毫火针点刺根结穴疗法改善慢性非特异性下腰痛临床症状和满意度的疗效观察[J].针灸临床杂志,2018,34(08):47-51.

Zhang WY, Ding Y. Effect of Filiform Fire-Needling Therapy on the Improvements of Clinical Symptoms and Therapeutic Satisfaction in NLBP Patients through Pricking Starting and Terminal Points. Journal of Clinical Acupuncture and Moxibustion. 2018,34(08):47-51.

[14] 张洪玉.隔姜灸治疗非特异性下腰痛临床观察[J].四川中医,2014,32(06):159-160.

Zhang HY. Clinical observation of ginger moxibustion in the treatment of nonspecific low back pain. Journal of Sichuan of Traditional Chinese Medicine. 2014,32(06):159-160.

[15] 金晓飞,李茹,陈利芳等.浮刺结合温灸治疗慢性非特异性腰背痛:随机对照预试验[J].中国针灸,2018,38(10):1058-1062.

Jin XF, Li R, Chen LF, et al. A randomized controlled pilot on chronic non-specific low back pain treated with the superficial needling therapy combined with mild moxibustion. Chinese Acupuncture & Moxibustion. 2018,38(10):1058-1062.

[16] Hossein Vakilsamad. 耳穴磁珠法对腰痛的临床疗效观察[D].北京中医药大学,2018.

Hossein V. Clinical Research on Low Back Pain Treatment by Auricular Acupressure with Magnetic Pellet[Master]. Beijing University of Traditional Chinese Medicine, 2018.

[17] 叶锐,张光彩,赵瑾等.电针治疗慢性非特异性下腰痛临床研究[J].中医学报,2017,32(09):1796-1798.

Ye R, Zhang GC, Zhao J, et al. Clinical Study of Electro-acupuncture in Treatment of Chronic Nonspecific Low Back Pain. Acta Chinese Medicine. 2017,32(09):1796-1798.

[18] 杨元庆,张智龙,李思等.电针阿是穴治疗下腰痛临床观察[J].天津中医药,2017,34(05):315-319.

Yang YQ, Zhang ZL, Li S, et al. Effect observation of electro acupuncture at Ashiacupoints for treatment of lowback pain. Tianjin Journal of Traditional Chinese Medicine. 2017,34(05):315-319.

[19] 赖鹏辉,邓焕华,吴家民等.电温针灸治疗寒湿型非特异性下腰痛临床研究[J].针灸临床杂志,2019,35(01):30-33.

Lai PH, Deng HH, Wu JM, et al. Clinical Observation of Electrothermic-Needling Moxibustion Treating NLBP of Cold-Dampness Pattern. Journal of Clinical Acupuncture and Moxibustion. 2019,35(01):30-33.

[20] 李锦恒.阿是穴斜刺治疗慢性非特异性腰痛临床观察[J].山西中医学院学报,2017,18(06):50-52.

Li JH. Clinical observation on chronic nonspecific low back pain treated with oblique acupuncture. Journal of Shanxi University of Chinese Medicine. 2017,18(06):50-52.

[21] 田靖,牛军.“益髓通督”针刺法治疗慢性非特异性下腰痛临床效果观察[J].临床军医杂志,2019,47(06):618-619.

Tian J, Niu J. Observation on the clinical effect of "Yi sui tong du" acupuncture on chronic non-specific low back pain. Clinical Journal of Medical Officers. 2019,47(06):618-619.

[22] Zaringhalam J, Manaheji H, Rastqar A, et al. Reduction of chronic non-specific low back pain: A randomised controlled clinical trial on acupuncture and baclofen. Chinese Medicine, 2010, 5(1):15-15.

[23] Thomas, K J. Randomised controlled trial of a short course of traditional acupuncture compared with usual care for persistent non-specific low back pain. BMJ, 2006, 333(7569):623.

[24] Comachio J, Oliveira C C, Silva I F R, et al. Effectiveness of Manual and Electrical Acupuncture for Chronic Non-specic Low Back Pain: A Randomized Controlled Trial. Journal of Acupuncture and Meridian Studies, 2020.

[25] Ushinohama A, Cunha BP, Costa LO, et al. Effect of a single session of ear acupuncture on pain intensity and postural control in individuals with chronic low back pain: a randomized controlled trial. Braz J Phys Ther. 2016;20(4):328-335. doi:10.1590/bjpt-rbf.2014.0158.

[26] Leite PMS, Mendonça ARC, Maciel LYS, et al. Does Electroacupuncture Treatment Reduce Pain and Change Quantitative Sensory Testing Responses in Patients with Chronic Nonspecific Low Back Pain? A Randomized Controlled Clinical Trial. Evid Based Complement Alternat Med. 2018 Oct 8;2018:8586746.

[27] Vas J, José M A, Modesto M, et al. Acupuncture in patients with acute low back pain: A multicentre randomised controlled clinical trial. Pain, 2012, 153(9):1883-1889.

[28] Skonnord T, Skjeie H, Brekke M, et al. Acupuncture for acute non-specific low back pain: a randomised, controlled, multicentre intervention study in general practice—the Acuback study. BMJ Open, 2020, 10(8):e034157.

[29] Tatiana, Molinas, Hasegawa, et al. Acupuncture for acute non-specific low back pain: a randomised, controlled, double-blind, placebo trial. Acupuncture in medicine : journal of the British Medical Acupuncture Society, 2014, 32(2):109-115.

[30] Cho Y J, Song Y K, Cha Y Y, et al. Acupuncture for chronic low back pain: a multicenter, randomized, patient-assessor blind, sham-controlled clinical trial. Spine, 2013, 38(7):549-557.

**Additional file 5** Treatment ranking and SUCRA for outcome data

1. Treatment ranking and SUCRA for VAS score

| Treat | SUCRA | PrBest | MeanRank |
| --- | --- | --- | --- |
| A | 31.4 | 0.0 | 10.6 |
| B | 34.0 | 0.0 | 10.2 |
| C | 52.2 | 0.3 | 7.7 |
| D | 13.9 | 0.0 | 13.1 |
| E | 20.3 | 0.0 | 12.2 |
| F | 3.1 | 0.0 | 14.6 |
| G | 40.7 | 0.2 | 9.3 |
| H | 69.1 | 13.5 | 5.3 |
| I | 73.1 | 6.0 | 4.8 |
| J | 76.7 | 20.1 | 4.3 |
| K | 53.1 | 4.3 | 7.6 |
| L | 72.7 | 12.8 | 4.8 |
| M | 71.9 | 7.3 | 4.9 |
| N | 47.4 | 0.2 | 8.4 |
| O | 90.6 | 35.4 | 2.3 |

（2）Treatment ranking and SUCRA for ODI score

| Treat | SUCRA | PrBest | MeanRank |
| --- | --- | --- | --- |
| A | 45.7 | 0.1 | 6.4 |
| B | 53.9 | 4.1 | 5.6 |
| C | 71.0 | 24.1 | 3.9 |
| D | 16.4 | 0.0 | 9.4 |
| E | 39.8 | 2.1 | 7.0 |
| F | 24.3 | 0.0 | 8.6 |
| G | 52.0 | 10.7 | 5.8 |
| I | 51.0 | 11.8 | 5.9 |
| K | 53.7 | 8.7 | 5.6 |
| M | 68.9 | 13.8 | 4.1 |
| N | 73.2 | 24.7 | 3.7 |
